# Supplementary material
Source: PubMed Central journal article supplement (PMC6446553)
Supplement: NIHMS1020329-supplement-Supporting_Information.pdf [file NIHMS1020329-supplement-Supporting_Information.pdf]

# Dual Toll-like Receptor Targeting Liposomal

## Spherical Nucleic Acids Supplemental Information

Jennifer R. Ferrer<sup>§¥€</sup>, Jason A. Wertheim<sup>¥⌘¶</sup>, Chad A. Mirkin<sup>§⌘€</sup>

§ Department of Chemistry, Northwestern University, Evanston, IL 60208

¥ Department of Surgery, Northwestern Feinberg School of Medicine, Chicago, IL 60611

⌘ Department of Biomedical Engineering, Northwestern University, Evanston, IL 60208

¶ Department of Surgery, Jesse Brown VA Medical Center, Chicago, IL 60612

€ International Institute for Nanotechnology, Evanston, IL 60208

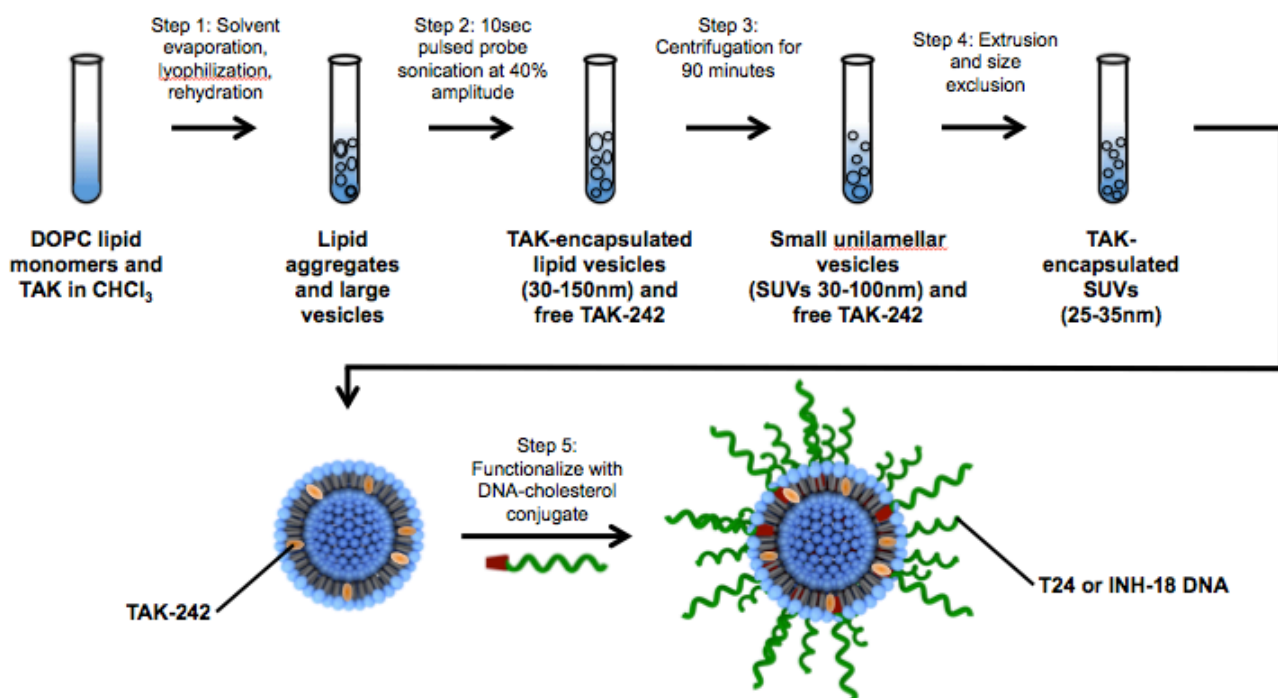

**SI Figure 1.** Synthesis steps for TAK-encapsulated LSNAs. Lipid films with or without TAK-242 were rehydrated in buffer and extruded through a series of increasingly smaller pores to create uniform, small unilamellar vesicles (SUVs). Once the desired SUV size was achieved, cholesterol-terminated DNA was mixed with SUVs, allowing functionalization of the liposome surface with oligonucleotides through hydrophobic interactions.

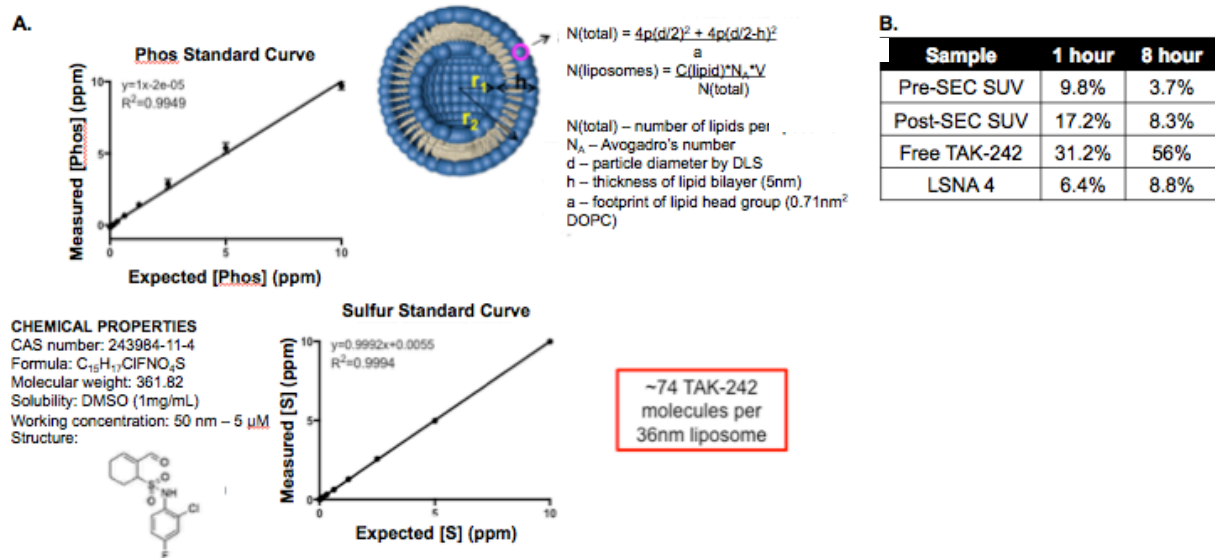

**SI Figure 2.** Example standard curves for calculating phosphorous (lipid, A) and sulfur (TAK-242, B) concentrations (A). Table shows percent loss of TAK-242 from particles during dialysis (B).

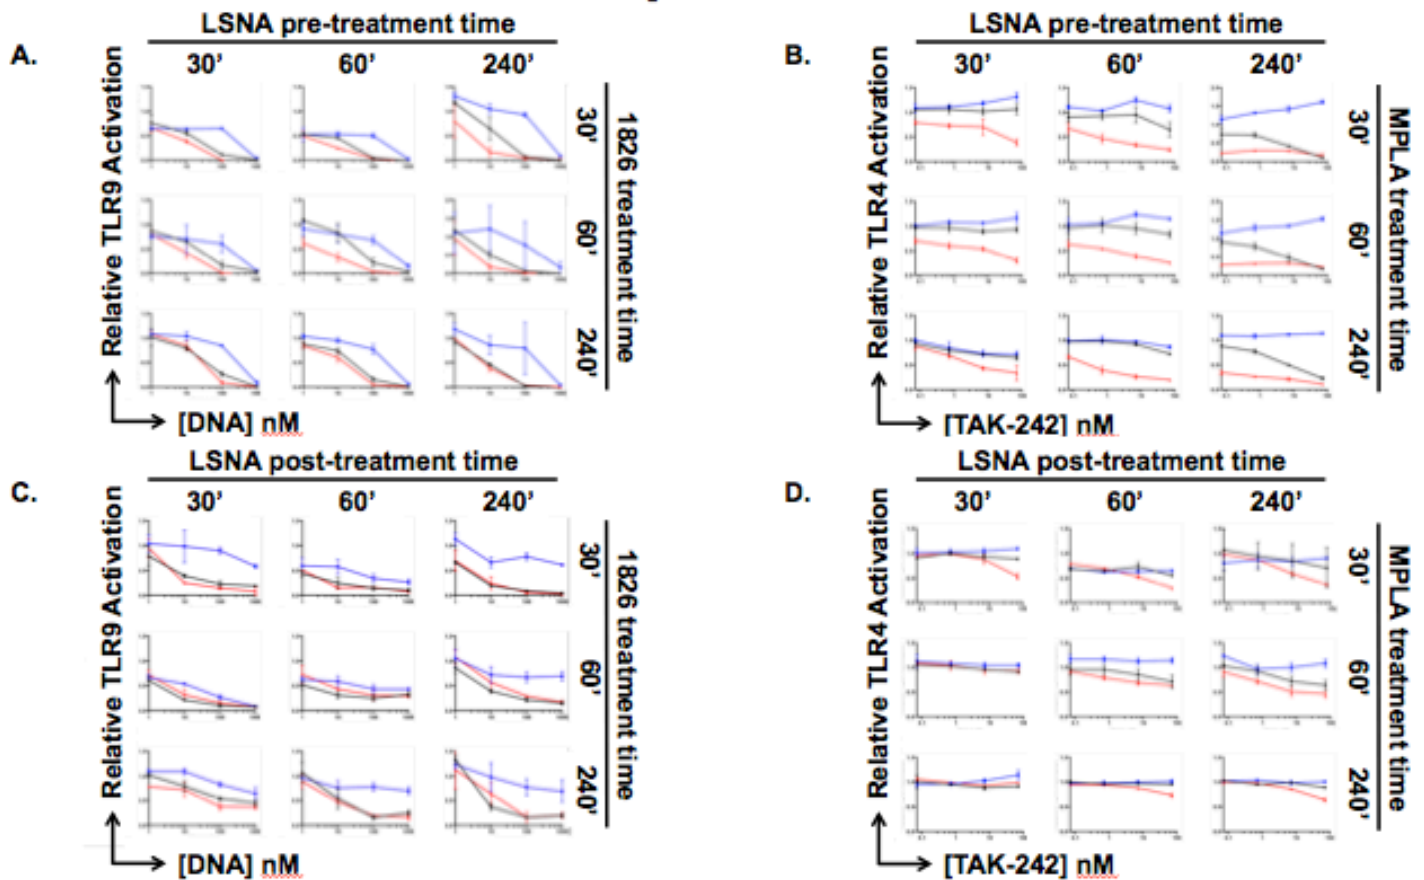

**SI Figure 3.** All LSNA pre- and post-treatment conditions. Longer exposure to either agonist or antagonists enhanced the effect of each treatment. TLR9 graphs (A,C) show the comparison between free INH-18 (black), LSNA1 (T24 LSNA, blue), and LSNA2 (INH-18 LSNA, red). TLR4 graphs (B,D) show the comparison between free TAK-242 (black), LSNA1 (T24, no TAK-242, blue), and LSNA3 (T24 with TAK-242, red).

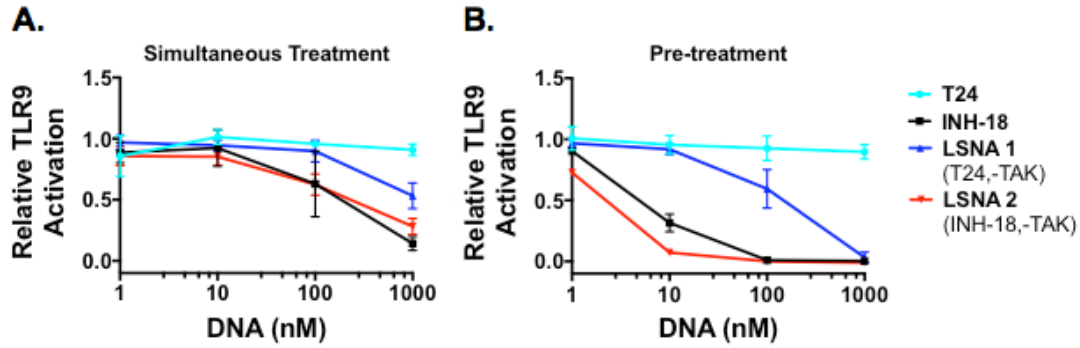

**SI Figure 4.** LSNA structure may be inherently TLR9 inhibitory. When HEK-Blue mTLR9 cells are treated with agonists and antagonists simultaneously (A), or when antagonists are used as a pre-treatment (B), the non-targeting LSNA (LSNA1) demonstrates TLR9 inhibitory activity whereas the linear T24 sequence does not.

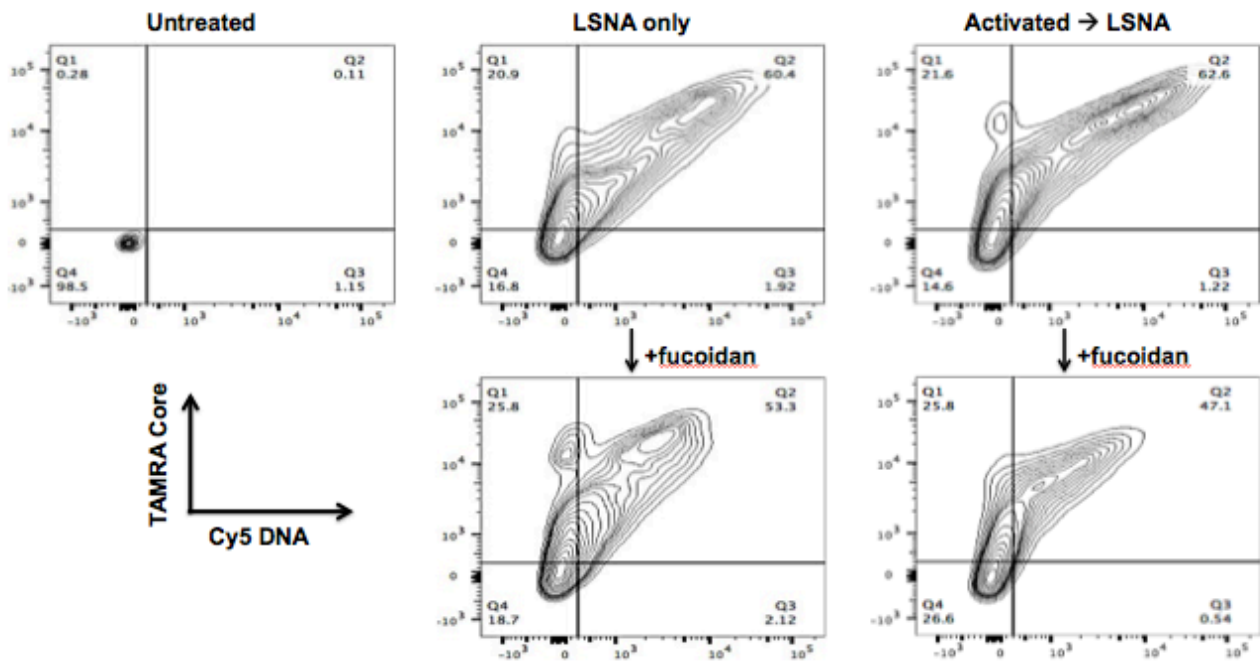

**SI Figure 5.** Activation of thioglycollate-elicited mouse peritoneal macrophages does not affect overall LSNA uptake. Fucoidan, a scavenger receptor A inhibitor, reduces uptake of dual fluorophore-labeled LSNA.

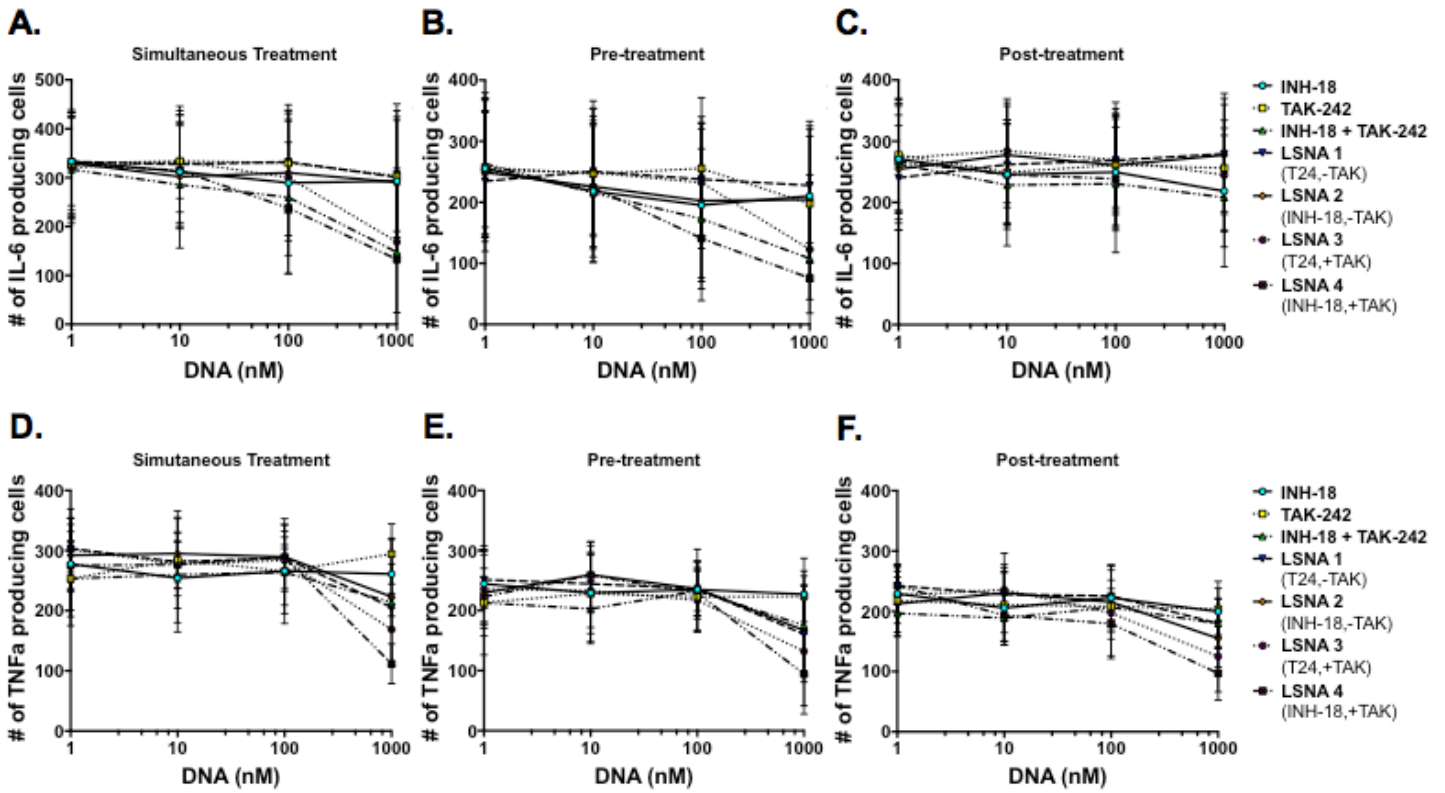

**SI Figure 6.** Peritoneal macrophage cytokine production over a range of inhibitor concentrations. IL-6 production during simultaneous treatment (A), pre-treatment (B), and post-treatment (C); TNF $\alpha$  production during simultaneous treatment (D), pre-treatment (E), and post-treatment (F).

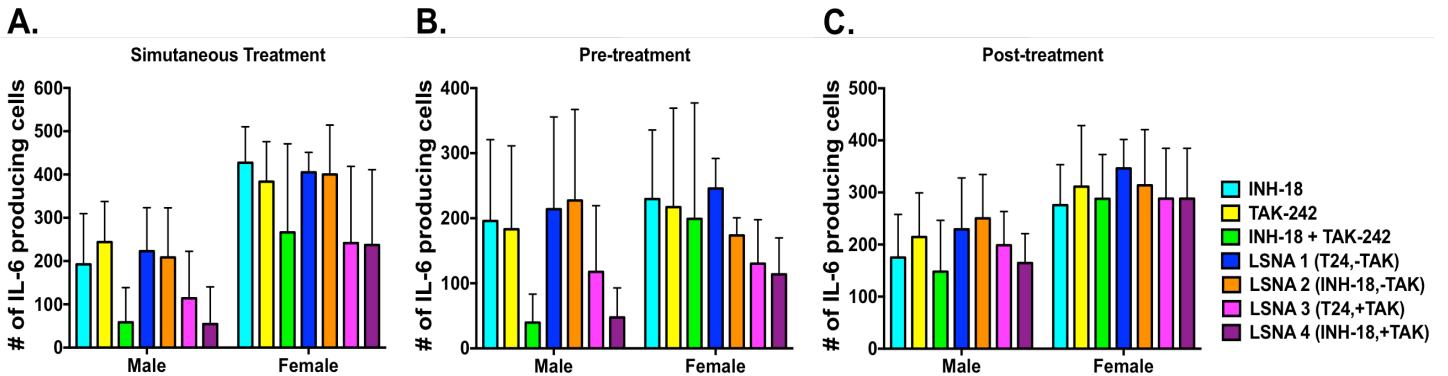

**SI Figure 7.** IL-6 production by male and female peritoneal macrophages. Although TLR4/9-stimulated male and female peritoneal macrophages both produced similar levels of IL-6, male peritoneal macrophages seemed more sensitive to antagonist and LSNA treatment than female macrophages. This trend was observed most noticeably during simultaneous treatment and pre-treatment conditions.
